# Supplementary material
Source: PubMed Central journal article supplement (PMC5961391)
Supplement: DC171900SupplementaryData.pdf [file DC171900SupplementaryData.pdf]

SUPPLEMENTARY DATA

**Supplementary Figure S1.** Prevalence (A and B) and predicted diabetic retinopathy at 15-years (C and D) based on direct ophthalmoscopy. Retinopathy (any) in relation to glucose deciles (A and C) and receiver operating characteristic curves (B and D) of 1h-plasma glucose and 2h-plasma glucose concentrations. Includes individuals on diabetic medications. In Figures A and C, the glucose values shown are the lower bound for each decile.

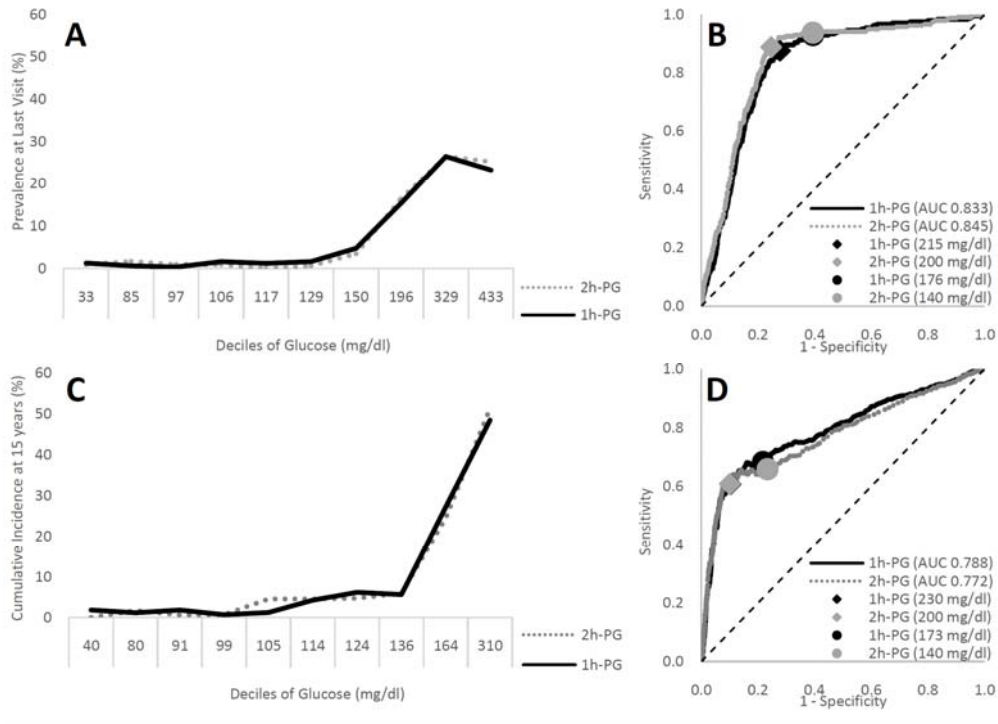

SUPPLEMENTARY DATA

**Supplementary Figure S2.** Predicted severe diabetic retinopathy at 25 years (A and B) diagnosed by direct ophthalmoscopy (excluding individuals on diabetic medications). (A) Predicted diabetic retinopathy at 25-years based on glucose deciles of 1h-plasma glucose and 2h-plasma glucose concentrations. (B) Receiver operating characteristic curves for 1h-plasma glucose and 2h-plasma glucose concentrations.

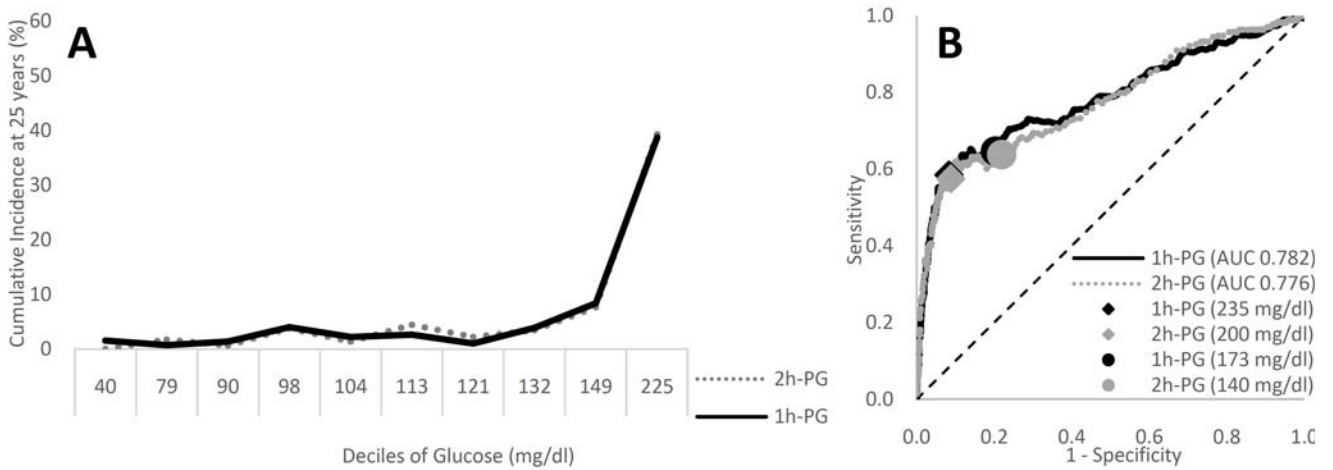

SUPPLEMENTARY DATA

**Supplementary Figure S3.** Receiver operating characteristic curve analyses comparing 1h-PG and 2h-PG for any retinopathy diagnosed by retinal photography. (A) Unadjusted. (B) Adjusted for follow-up time

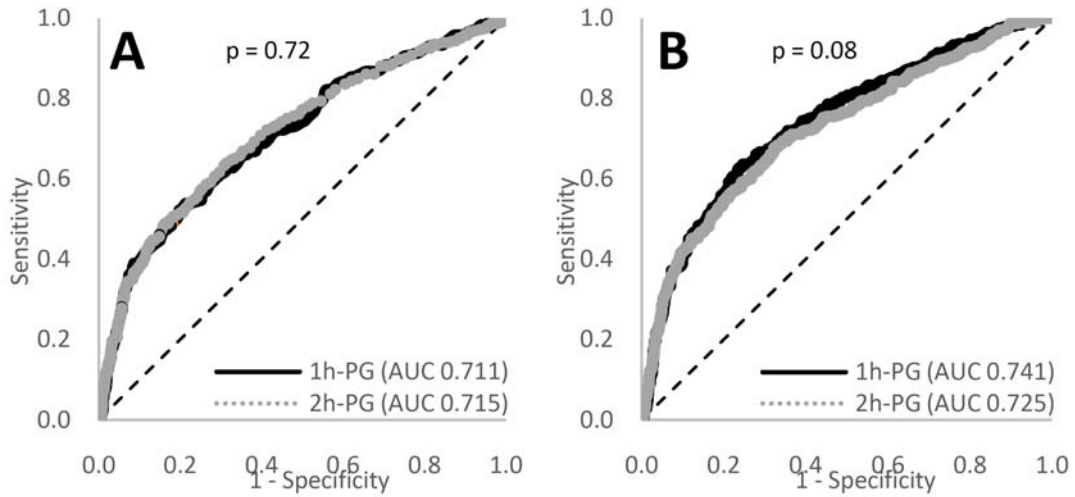

SUPPLEMENTARY DATA

**Supplementary Figure S4.** Prevalence (A) and predicted diabetic retinopathy at 15-years (B) based on direct ophthalmoscopy. Prevalence and cumulative incidence based on deciles of 1h-PG and 2h-PG, and plotted using the mid-point of the glucose range within each decile.

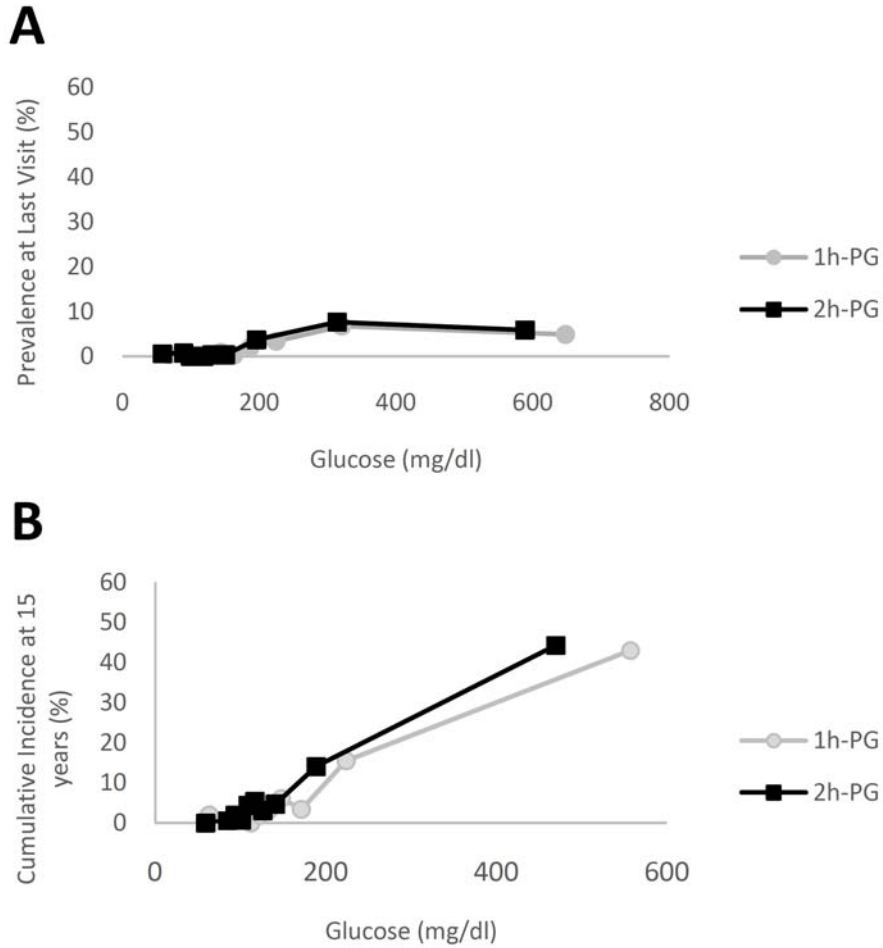

SUPPLEMENTARY DATA

**Supplementary Table S1.** Cross-tabulation of 1h-PG and 2h-PG deciles. Numbers represent counts.

| <b>No retinopathy</b> |              |          |          |          |          |          |          |          |          |           |              |
|-----------------------|--------------|----------|----------|----------|----------|----------|----------|----------|----------|-----------|--------------|
| <b>2h-PG</b>          | <b>1h-PG</b> |          |          |          |          |          |          |          |          |           | <b>Total</b> |
|                       | <b>1</b>     | <b>2</b> | <b>3</b> | <b>4</b> | <b>5</b> | <b>6</b> | <b>7</b> | <b>8</b> | <b>9</b> | <b>10</b> |              |
| <b>1</b>              | 120          | 56       | 45       | 29       | 19       | 13       | 9        | 2        | 0        | 0         | 293          |
| <b>2</b>              | 61           | 64       | 44       | 40       | 27       | 14       | 11       | 6        | 0        | 0         | 267          |
| <b>3</b>              | 50           | 75       | 56       | 42       | 42       | 32       | 12       | 5        | 0        | 0         | 314          |
| <b>4</b>              | 23           | 50       | 48       | 52       | 50       | 21       | 22       | 2        | 1        | 0         | 269          |
| <b>5</b>              | 16           | 37       | 53       | 52       | 49       | 52       | 30       | 10       | 1        | 0         | 300          |
| <b>6</b>              | 10           | 11       | 32       | 50       | 45       | 73       | 49       | 13       | 3        | 0         | 286          |
| <b>7</b>              | 1            | 4        | 6        | 13       | 46       | 73       | 81       | 56       | 2        | 0         | 282          |
| <b>8</b>              | 1            | 0        | 2        | 4        | 5        | 16       | 64       | 151      | 36       | 0         | 279          |
| <b>9</b>              | 0            | 0        | 0        | 0        | 0        | 0        | 0        | 33       | 189      | 35        | 257          |
| <b>10</b>             | 0            | 0        | 0        | 0        | 0        | 0        | 0        | 0        | 33       | 228       | 261          |
| <b>Total</b>          | 282          | 297      | 286      | 282      | 283      | 294      | 278      | 278      | 265      | 263       | 2808         |

| <b>Any retinopathy</b> |              |          |          |          |          |          |          |          |          |           |              |
|------------------------|--------------|----------|----------|----------|----------|----------|----------|----------|----------|-----------|--------------|
| <b>2h-PG</b>           | <b>1h-PG</b> |          |          |          |          |          |          |          |          |           | <b>Total</b> |
|                        | <b>1</b>     | <b>2</b> | <b>3</b> | <b>4</b> | <b>5</b> | <b>6</b> | <b>7</b> | <b>8</b> | <b>9</b> | <b>10</b> |              |
| <b>1</b>               | 1            | 0        | 1        | 0        | 0        | 0        | 0        | 0        | 0        | 0         | 2            |
| <b>2</b>               | 1            | 0        | 0        | 0        | 0        | 0        | 0        | 0        | 0        | 0         | 1            |
| <b>3</b>               | 0            | 1        | 0        | 0        | 0        | 0        | 0        | 0        | 0        | 0         | 1            |
| <b>4</b>               | 1            | 0        | 1        | 0        | 0        | 0        | 0        | 0        | 0        | 0         | 2            |
| <b>5</b>               | 0            | 4        | 0        | 0        | 0        | 1        | 1        | 0        | 0        | 0         | 6            |
| <b>6</b>               | 0            | 0        | 0        | 2        | 0        | 0        | 1        | 0        | 0        | 0         | 3            |
| <b>7</b>               | 0            | 0        | 0        | 0        | 0        | 0        | 1        | 2        | 4        | 0         | 7            |
| <b>8</b>               | 0            | 0        | 0        | 0        | 0        | 0        | 0        | 9        | 3        | 0         | 12           |
| <b>9</b>               | 0            | 0        | 0        | 0        | 0        | 0        | 0        | 0        | 23       | 6         | 29           |
| <b>10</b>              | 0            | 0        | 0        | 0        | 0        | 0        | 0        | 0        | 1        | 23        | 24           |
| <b>Total</b>           | 3            | 5        | 2        | 2        | 0        | 1        | 3        | 11       | 31       | 29        | 87           |

SUPPLEMENTARY DATA

**Supplementary Table S2.** Concordance of 1h-PG and 2h-PG in classifying volunteers into normal glucose tolerance, impaired glucose tolerance, and type 2 diabetes categories

| <i>Cross-sectional (n = 2895)</i>            |              |      |                  |  |       |
|----------------------------------------------|--------------|------|------------------|--|-------|
|                                              | <b>2h-PG</b> |      | <b>1h-PG</b>     |  | Total |
|                                              | NGT          | IGT* | Type 2 Diabetes† |  |       |
| NGT                                          | 1585         | 182  | 10               |  | 1777  |
| IGT*                                         | 152          | 252  | 51               |  | 455   |
| Type 2 Diabetes†                             | 2            | 58   | 603              |  | 663   |
| Total                                        | 1739         | 492  | 664              |  | 2895  |
| Weighted $\kappa = 0.81$ (95% CI 0.79, 0.82) |              |      |                  |  |       |
| <i>Longitudinal (n = 1703)</i>               |              |      |                  |  |       |
|                                              | <b>2h-PG</b> |      | <b>1h-PG</b>     |  | Total |
|                                              | NGT          | IGT* | Type 2 Diabetes† |  |       |
| NGT                                          | 1203         | 79   | 2                |  | 1284  |
| IGT*                                         | 102          | 93   | 20               |  | 215   |
| Type 2 Diabetes†                             | 2            | 15   | 187              |  | 204   |
| Total                                        | 1307         | 187  | 209              |  | 1703  |
| Weighted $\kappa = 0.77$ (95% CI 0.74, 0.80) |              |      |                  |  |       |

\* IGT cut-offs for 1h-PG ( $\geq 173$  mg/dl and  $< 230$  mg/dl) and 2h-PG ( $\geq 140$  mg/dl and  $< 200$  mg/dl)

† Type 2 diabetes cut-offs for 1h-PG ( $\geq 230$  mg/dl) and 2h-PG ( $\geq 200$  mg/dl)

2h-PG, 2h plasma glucose; 1h-PG, 1h plasma glucose; NGT, normal glucose tolerance; IGT, impaired glucose tolerance; CI, confidence interval.

SUPPLEMENTARY DATA

**Supplementary Table S3.** Discriminatory properties of 1h-plasma glucose and 2h-plasma glucose concentration for any retinopathy and severe retinopathy

| Model 1                    | C-statistic (95% CI)* | Model 2  | C-statistic (95% CI)* | P-value† |
|----------------------------|-----------------------|----------|-----------------------|----------|
| <b>Any retinopathy‡</b>    |                       |          |                       |          |
| 1h-PG                      | 0.778 (0.755, 0.801)  | 2h-PG    | 0.759 (0.735, 0.784)  | 0.04     |
| 1h-PG                      | 0.778 (0.755, 0.801)  | 1h,2h-PG | 0.780 (0.757, 0.803)  | 0.44     |
| 2h-PG                      | 0.759 (0.735, 0.784)  | 1h,2h-PG | 0.780 (0.757, 0.803)  | <0.001   |
| <b>Severe retinopathy‡</b> |                       |          |                       |          |
| 1h-PG                      | 0.796 (0.751, 0.840)  | 2h-PG    | 0.790 (0.748, 0.833)  | 0.72     |
| 1h-PG                      | 0.796 (0.751, 0.840)  | 1h,2h-PG | 0.803 (0.762, 0.844)  | 0.26     |
| 2h-PG                      | 0.790 (0.748, 0.833)  | 1h,2h-PG | 0.803 (0.762, 0.844)  | 0.15     |

\* C-statistic were calculated from models accounting for time-to-event and are analogous to the area under the ROC curve.

† P-values indicate significance of the difference in C-statistic from that of Model 1.

‡ n = 1703

Data are reported as C-statistic (95% CI, confidence interval). 1h-PG 1h plasma glucose model; 2h-PG, 2h plasma glucose model; 1h,2h-PG, 1h and 2h plasma glucose model.

**Supplementary Table S4.** Concordance of direct ophthalmoscopy and fundus photography exams to assign retinopathy (n = 1322, missing = 39)

| <i>Groups</i>                                |                           |            |        |       |
|----------------------------------------------|---------------------------|------------|--------|-------|
| <b>DO</b>                                    | <b>Fundus Photography</b> |            |        | Total |
|                                              | Normal                    | Non-severe | Severe |       |
| Normal                                       | 933                       | 126        | 7      | 1066  |
| Non-severe                                   | 21                        | 63         | 5      | 89    |
| Severe                                       | 25                        | 102        | 40     | 167   |
| Total                                        | 979                       | 291        | 52     | 1322  |
| Weighted $\kappa = 0.53$ (95% CI 0.48, 0.57) |                           |            |        |       |
| <i>Dichotomize</i>                           |                           |            |        |       |
| <b>DO</b>                                    | <b>Fundus Photography</b> |            |        |       |
|                                              | Normal                    | Any        | Total  |       |
| Normal                                       | 933                       | 133        | 1066   |       |
| Any                                          | 46                        | 210        | 256    |       |
| Total                                        | 979                       | 343        | 1322   |       |
| $\kappa = 0.62$ (95% CI 0.57, 0.67)          |                           |            |        |       |

DO, direct ophthalmoscopy; CI, confidence interval.
